# Supplementary material
Source: publisher figshare collection journal article supplement (https://tandf.figshare.com/ndownloader/files/13209008)
Supplement: Supplementary file 1 [file 13209008]

# Supplementary Material

## Synthesis of 1,2,5,6- and 1,4,5,8-anthracenetetrone: building blocks for $\pi$ -conjugated small molecules and polymers

Florian Glöcklhofer,<sup>\*,[a]</sup> Berthold Stöger,<sup>[b]</sup> Johannes Fröhlich<sup>[a]</sup>

<sup>[a]</sup> Institute of Applied Synthetic Chemistry, TU Wien, Getreidemarkt 9/163, 1060

Vienna, Austria

<sup>[b]</sup> X-Ray Centre, TU Wien, Getreidemarkt 9, 1060 Vienna, Austria

florian.gloecklhofer@tuwien.ac.at

### Table of contents:

|                                                       |     |
|-------------------------------------------------------|-----|
| 1. $^1\text{H}$ and $^{13}\text{C}$ (APT) NMR spectra | -2- |
| 2. X-ray structure determination                      | -5- |
| 3. References                                         | -8- |

## 1. $^1\text{H}$ and $^{13}\text{C}$ (APT) NMR spectra

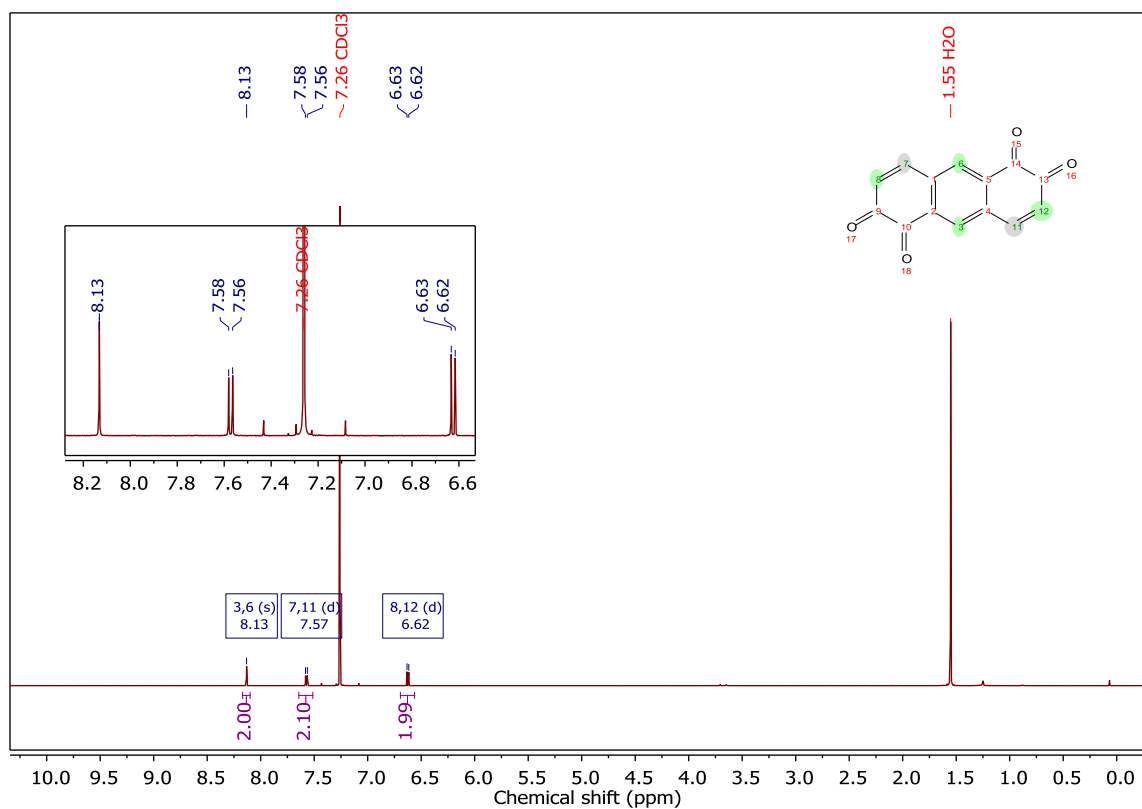

**Figure S1:**  $^1\text{H}$  NMR spectrum (600 MHz,  $\text{CDCl}_3$ ) of 1,2,5,6-anthracenetetrone **3a**.

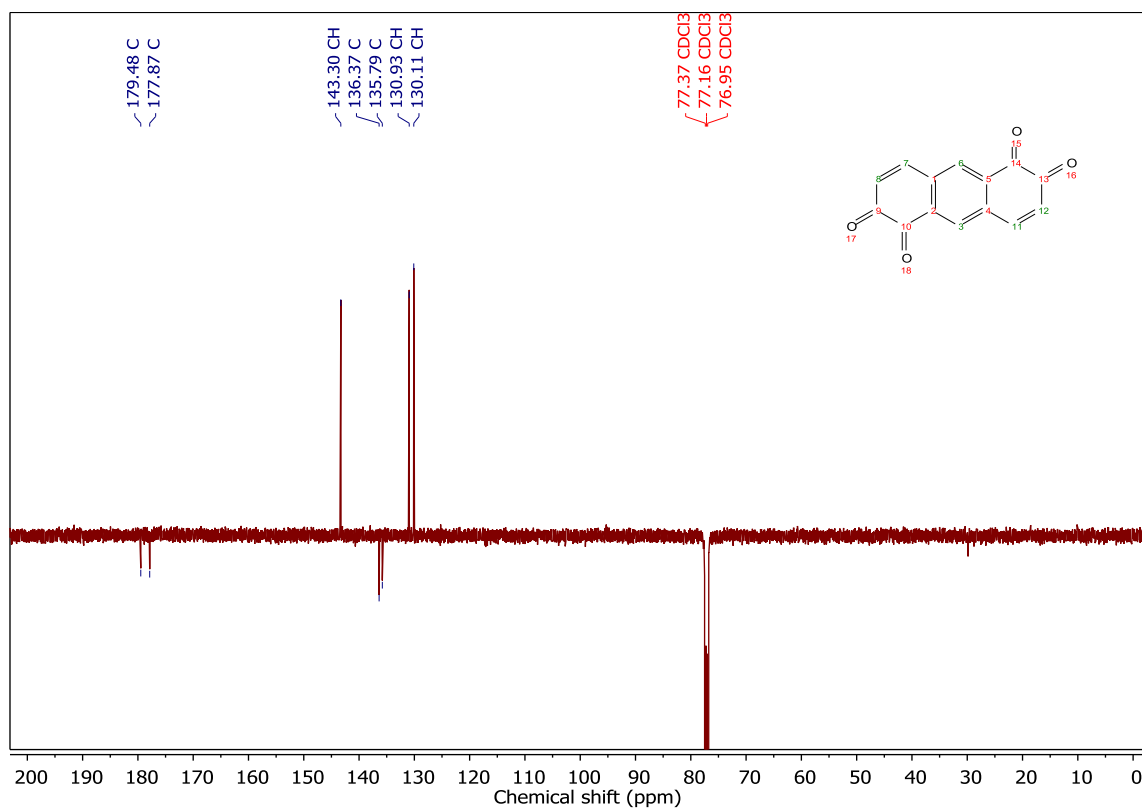

**Figure S2:**  $^{13}\text{C}$  NMR spectrum (151 MHz,  $\text{CDCl}_3$ ) of 1,2,5,6-anthracenetetrone **3a**.

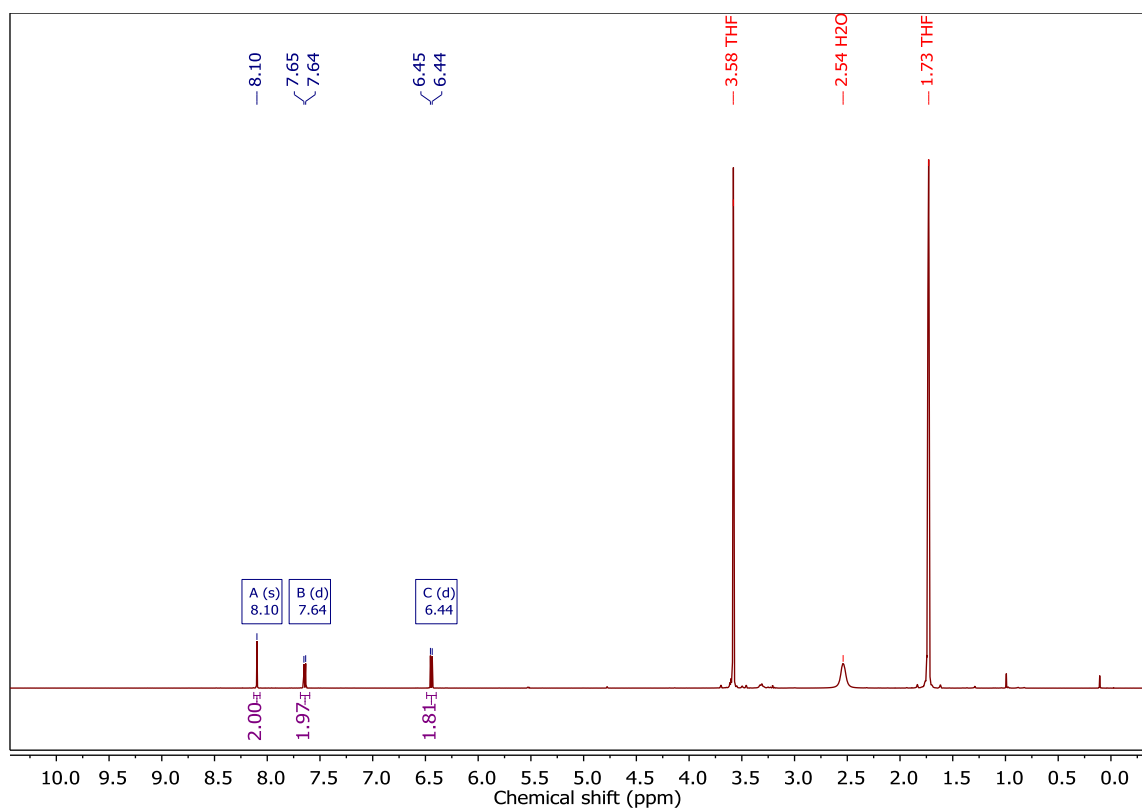

**Figure S3:** <sup>1</sup>H NMR spectrum (600 MHz, THF-d<sub>8</sub>) of 1,2,5,6-anthracenetetrone **3a**.

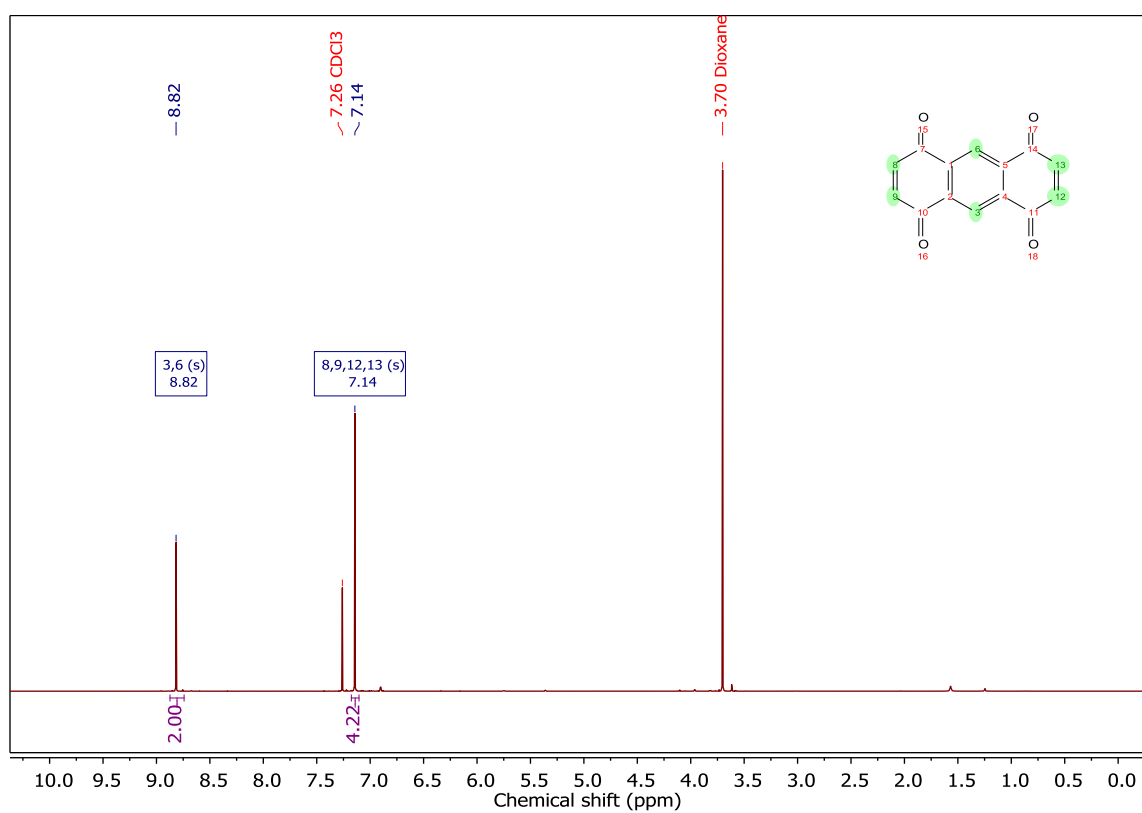

**Figure S4:** <sup>1</sup>H NMR spectrum (600 MHz, CDCl<sub>3</sub>) of 1,4,5,8-anthracenetetrone **3b**.

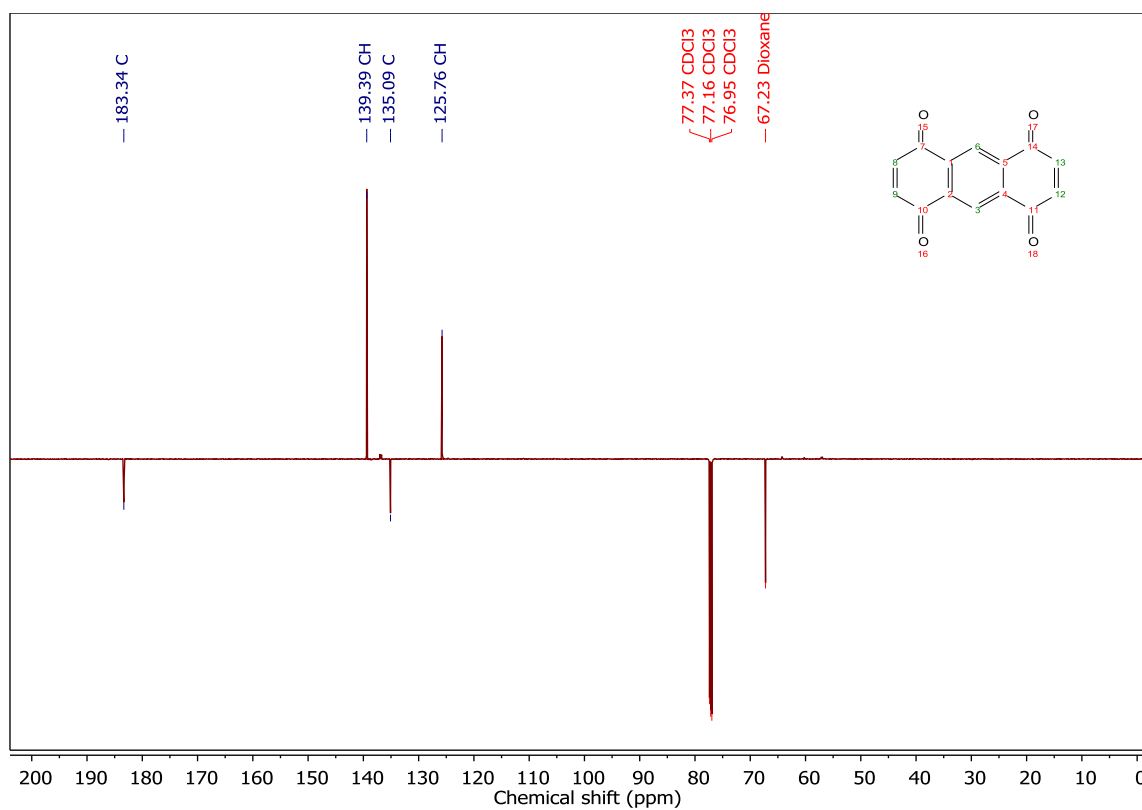

## 2. X-ray structure determination

X-ray diffraction data of 1,8-dibromo-4,5-dimethoxy-anthracene and 1,4,5,8-anthracetetron **3b** mono-dioxane solvate (CCDC 1836455 and 1836456) were collected at  $T = 100$  K in a dry stream of nitrogen on a Bruker Kappa APEX II diffractometer system using graphite-monochromatized Mo- $K\alpha$  radiation ( $\lambda = 0.71073$  Å) and fine sliced  $\varphi$ - and  $\omega$ -scans. Data were reduced to intensity values with SAINT and an absorption correction was applied with the multi-scan approach implemented in SADABS.<sup>1</sup> The structures were solved by the dual-space approach implemented in SHELXT<sup>2</sup> and refined against  $F^2$  with JANA2006.<sup>3</sup> Non-hydrogen atoms were refined anisotropically. The H atoms were placed in calculated positions and thereafter refined as riding on the parent atoms. Molecular graphics were generated with the program MERCURY.<sup>4</sup> Crystal data and experimental details are given in Table S1.

**Table S1.** Details for the crystal structure determinations.

|                                                         | 1,8-Dibromo-4,5-dimethoxyanthracene (crystals grown from toluene) | 1,4,5,8-anthracetetron <b>3b</b> ·1,4-dioxane  |
|---------------------------------------------------------|-------------------------------------------------------------------|------------------------------------------------|
| formula                                                 | C <sub>16</sub> H <sub>12</sub> Br <sub>2</sub> O <sub>2</sub>    | C <sub>18</sub> H <sub>14</sub> O <sub>6</sub> |
| fw                                                      | 396.1                                                             | 326.3                                          |
| cryst.size, mm                                          | 0.55 x 0.25 x 0.15                                                | 0.56 x 0.30 x 0.05                             |
| color, shape                                            | yellow, rod                                                       | red, plate                                     |
| crystal system                                          | orthorhombic                                                      | triclinic                                      |
| space group                                             | <i>Pbca</i> (no. 61)                                              | <i>P</i> -1 (no. 2)                            |
| <i>a</i> , Å                                            | 11.1261(9)                                                        | 5.9105(5)                                      |
| <i>b</i> , Å                                            | 13.9515(15)                                                       | 7.4641(6)                                      |
| <i>c</i> , Å                                            | 18.1481(15)                                                       | 8.5196(7)                                      |
| $\alpha$ , °                                            | 90                                                                | 80.296(3)                                      |
| $\beta$ , °                                             | 90                                                                | 81.290(3)                                      |
| $\gamma$ , °                                            | 90                                                                | 78.354(3)                                      |
| <i>V</i> , Å <sup>3</sup>                               | 2817.1(4)                                                         | 360.16(5)                                      |
| <i>T</i> , K                                            | 100                                                               | 100                                            |
| <i>Z</i> , <i>Z'</i>                                    | 8, 1                                                              | 1, 1                                           |
| $\rho_{\text{calc}}$ , g cm <sup>-3</sup>               | 1.8678                                                            | 1.5045                                         |
| $\mu$ , mm <sup>-1</sup> (MoK $\alpha$ )                | 5.753                                                             | 0.114                                          |
| <i>F</i> (000)                                          | 1552                                                              | 1360                                           |
| absorption corrections, $T_{\text{min}}-T_{\text{max}}$ | multi-scan, 0.04–0.42                                             | multi-scan, 0.12–0.32                          |

|                                                       |              |              |
|-------------------------------------------------------|--------------|--------------|
| $\theta$ range, deg                                   | 2.24–34.59   | 2.44–32.61   |
| no. of rflns measd                                    | 28885        | 9898         |
| $R_{\text{int}}$                                      | 0.0804       | 0.0241       |
| no. of rflns unique                                   | 5968         | 2612         |
| no. of rflns $I > 3\sigma(I)$                         | 3336         | 1989         |
| no. of params / restraints                            | 181 / 0      | 109 / 0      |
| $R(I > 3\sigma(I))$                                   | 0.0463       | 0.0459       |
| $R(\text{all data})$                                  | 0.1091       | 0.0608       |
| $wR(I > 3\sigma(I))$                                  | 0.0765       | 0.1364       |
| $wR(\text{all data})$                                 | 0.0923       | 0.1457       |
| Goof                                                  | 1.42         | 1.63         |
| Diff.Four.peaks<br>min/max, $\text{e}\text{\AA}^{-3}$ | -1.51 / 2.00 | -0.22 / 0.50 |
| CCDC no.                                              | 1836455      | 1836456      |

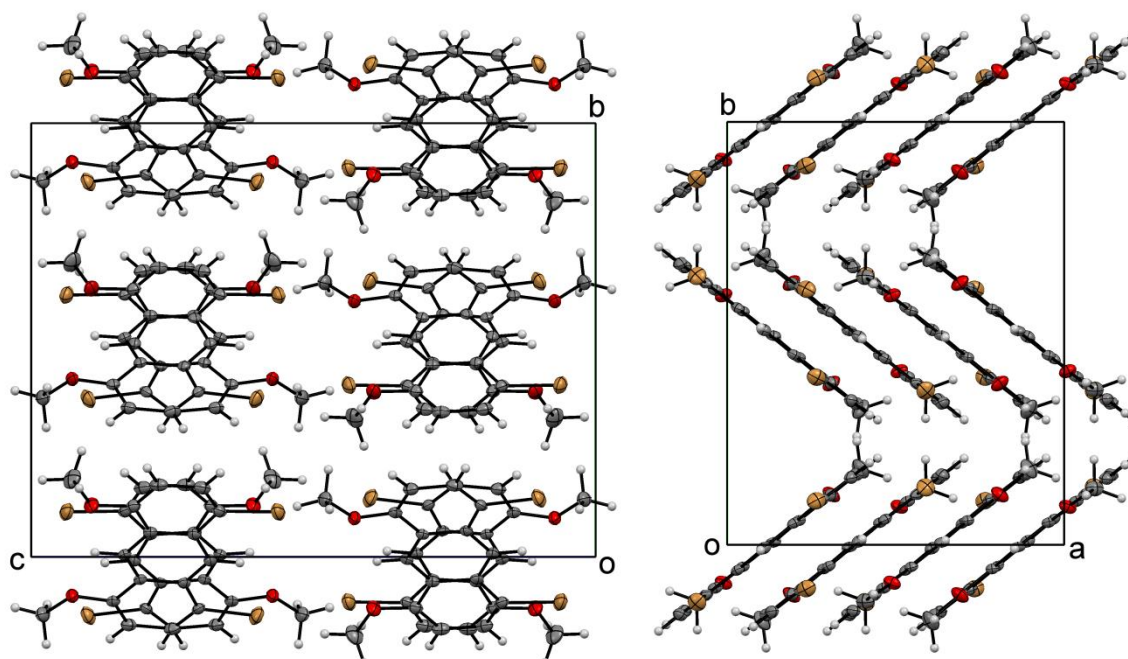

**Figure S6:** Crystal structure of 1,8-dibromo-4,5-dimethoxyanthracene viewed down [100] (left) and [001] (right). C (grey), O (red), and Br (orange) atoms are represented by ellipsoids drawn at the 50% probability levels; H atoms by white spheres of arbitrary radius.

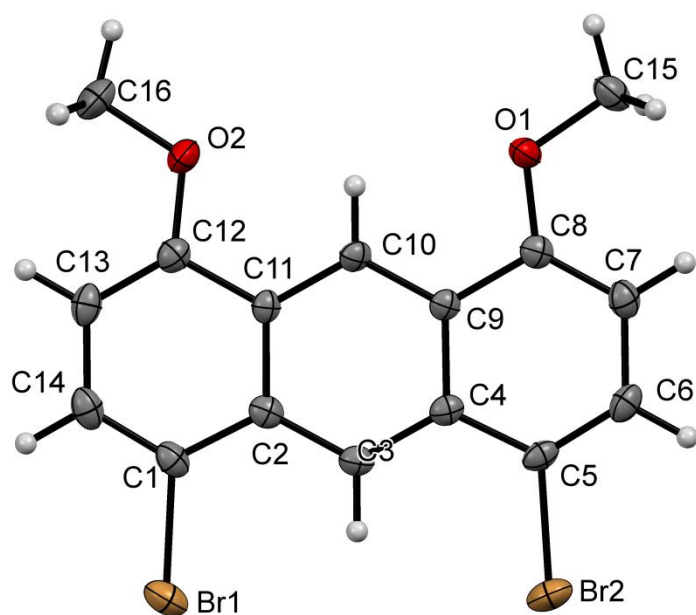

**Figure S7:** Molecular structure of 1,8-dibromo-4,5-dimethoxyanthracene. C (grey), O (red), Br (orange) atoms are represented by ellipsoids drawn at the 50% probability levels; H atoms by white spheres of arbitrary radius.

### 3. References

- (1) Bruker, APEX2, SAINT and SADABS 2015, Bruker AXS Inc., Madison, Wisconsin, USA.
- (2) Sheldrick, G. M. *Acta Crystallogr., Sect. A* **2015**, *71*, 3-8.
- (3) Petříček, V.; Dušek, M.; Palatinus, L. Z. *Kristallogr. - Cryst. Mater.* **2014**, *229*, 345-352.
- (4) Macrae, C. F.; Edgington, P. R.; McCabe, P.; Pidcock, E.; Shields, G. P.; Taylor, R.; Towler, M.; van de Streek, J. *J. Appl. Crystallogr.* **2006**, *39*, 453-457.
